# Supplementary material for: Quantification of Nonproteolytic Clostridium botulinum Spore Loads in Food Materials
Source: PubMed Central journal article supplement (PMC4784027; doi:10.1128/aem.03630-15), 2016-03-07
Supplement: AEM.03630-15_zam999116982so1.pdf [file AEM.03630-15_zam999116982so1.pdf]

1 **Quantification of non-proteolytic *Clostridium botulinum* spore loads in food materials**

2

3 **Gary. C. Barker, Pradeep K. Malakar, June Plowman and Michael W. Peck\***

4

5 **Representation of posterior probability distributions using cubic B-splines**

6 The posterior probability distributions for the logarithm of spore concentration in food materials have  
7 complex forms that can, most economically, be represented by cubic B-splines (e.g. Press WH.,  
8 Teukolsky SA, Vettering WT, Flannery BP. 1986. Numerical recipes in Fortran. Cambridge University  
9 Press, Cambridge.). These forms provide the necessary facility for secondary computation such as  
10 marginalization or convolution etc.

11

12 The logarithm of the posterior probability is chosen as the interpolation variable and splines are based  
13 on 21 evenly spaced points beginning with  $x_0 = -1.9$  and with an increment  $\Delta x = 0.2$  (where  $x = \text{Log}(s)$   
14 and  $s \text{ kg}^{-1}$  is the spore concentration). For each food category the spline is given as

15 
$$S_3(x) = \sum_{i=-1}^{21} a_i B_i(x)$$

16 with  $B_i(x) = B_0(x - i\Delta x)$  and

|    |                                                      |                                              |
|----|------------------------------------------------------|----------------------------------------------|
| 17 | $B_0(x) = 0$                                         | $x \leq x_0 - 2\Delta x$                     |
|    | $(2\Delta x + x - x_0)^3/6$                          | $x_0 - 2\Delta x \leq x \leq x_0 - \Delta x$ |
|    | $2\Delta x^3/3 - (x - x_0)^2(2\Delta x + x - x_0)/2$ | $x_0 - \Delta x \leq x \leq x_0$             |
|    | $2\Delta x^3/3 - (x - x_0)^2(2\Delta x - x + x_0)/2$ | $x_0 \leq x \leq x_0 + \Delta x$             |
| 18 | $(2\Delta x - x + x_0)^3/6$                          | $x_0 + \Delta x \leq x \leq x_0 + 2\Delta x$ |
|    | 0                                                    | $x_0 + 2\Delta x \leq x$                     |

19 The coefficients  $a_i$  with  $i = 0, 20$  are given, for each food category in the table below and  $a_{-1} = 2a_0 - a_1,$

20  $a_{21} = 2a_{20} - a_{19}.$

21 Table: Coefficients for cubic B-Spline interpolation of the logarithm of the posterior probability density  
 22 for the spore concentration in food materials – Meat (ME), Fish (FI), Dairy liquid (DL), Dairy non-  
 23 liquid (DN), Cereals (CE), Plants (PL), Shellfish (SH), Mushroom & Fungi (MF), Herbs & Spices (HS).

| B-Spline<br>coefficient | Food Material |         |         |         |         |          |         |         |         |
|-------------------------|---------------|---------|---------|---------|---------|----------|---------|---------|---------|
|                         | ME            | FI      | DL      | DN      | CE      | PL       | SH      | MF      | HS      |
| <b>a<sub>0</sub></b>    | -149.6        | -369.8  | -228.5  | -321.1  | -270.9  | -324.8   | -407.5  | -610.7  | -346.3  |
| <b>a<sub>1</sub></b>    | -122.4        | -333.8  | -200.2  | -279.9  | -241.0  | -293.0   | -360.8  | -511.4  | -311.7  |
| <b>a<sub>2</sub></b>    | -96.5         | -295.8  | -171.7  | -239.4  | -212.6  | -260.0   | -315.1  | -416.3  | -276.4  |
| <b>a<sub>3</sub></b>    | -73.6         | -258.1  | -143.7  | -200.4  | -183.0  | -227.6   | -269.8  | -326.3  | -241.0  |
| <b>a<sub>4</sub></b>    | -54.9         | -220.9  | -117.1  | -163.1  | -155.0  | -195.3   | -225.5  | -244.7  | -206.8  |
| <b>a<sub>5</sub></b>    | -41.6         | -185.4  | -92.1   | -128.6  | -128.2  | -164.0   | -182.9  | -174.9  | -174.1  |
| <b>a<sub>6</sub></b>    | -33.1         | -151.3  | -69.4   | -96.8   | -103.2  | -134.6   | -142.1  | -125.3  | -143.2  |
| <b>a<sub>7</sub></b>    | -25.5         | -119.0  | -49.0   | -68.1   | -80.2   | -106.3   | -103.7  | -97.8   | -114.4  |
| <b>a<sub>8</sub></b>    | -16.0         | -88.8   | -31.1   | -42.6   | -59.3   | -80.4    | -68.2   | -132.9  | -88.2   |
| <b>a<sub>9</sub></b>    | -12.9         | -60.9   | -16.7   | -20.4   | -40.9   | -56.4    | -36.5   | -82.8   | -64.2   |
| <b>a<sub>10</sub></b>   | -28.9         | -35.5   | -8.1    | -3.5    | -25.2   | -34.9    | -9.9    | 21.9    | -43.3   |
| <b>a<sub>11</sub></b>   | -78.5         | -13.2   | -9.8    | 3.0     | -12.9   | -15.8    | 9.7     | 38.2    | -25.6   |
| <b>a<sub>12</sub></b>   | -123.0        | 4.3     | -29.6   | -10.0   | -5.5    | 0.3      | 11.2    | -18.4   | -12.8   |
| <b>a<sub>13</sub></b>   | -239.9        | 11.0    | -57.9   | -46.0   | -10.2   | 9.7      | -10.7   | -5.4    | -7.4    |
| <b>a<sub>14</sub></b>   | -406.2        | -10.2   | -129.7  | -92.1   | -31.6   | -4.7     | -87.7   | -115.8  | -11.4   |
| <b>a<sub>15</sub></b>   | -709.2        | -96.5   | -271.3  | -248.8  | -119.8  | -118.8   | -265.4  | -316.9  | -28.4   |
| <b>a<sub>16</sub></b>   | -1244.2       | -340.1  | -537.8  | -479.1  | -320.6  | -467.8   | -629.9  | -704.3  | -79.8   |
| <b>a<sub>17</sub></b>   | -2173.9       | -865.7  | -1010.0 | -941.7  | -798.1  | -1534.2  | -1374.9 | -1453.0 | -175.9  |
| <b>a<sub>18</sub></b>   | -3953.8       | -2060.8 | -1948.0 | -1843.6 | -1809.6 | -3435.6  | -2702.3 | -2624.0 | -381.6  |
| <b>a<sub>19</sub></b>   | -6833.3       | -4141.6 | -3487.2 | -3327.7 | -3639.9 | -8917.9  | -5601.7 | -5554.0 | -724.8  |
| <b>a<sub>20</sub></b>   | -13157.4      | -9116.2 | -7079.8 | -6693.5 | -8155.0 | -13250.0 | -7875.0 | -7875.0 | -1560.8 |

24
